# Supplementary material for: Transcriptome Analysis Revealed the Possible Reasons for the Change of Ni Resistance in Rhus typhina after Spraying Melatonin
Source: MDPI journal article supplement (doi:10.3390/plants13101287), 2024-05-07
Supplement: s1 [file s1]

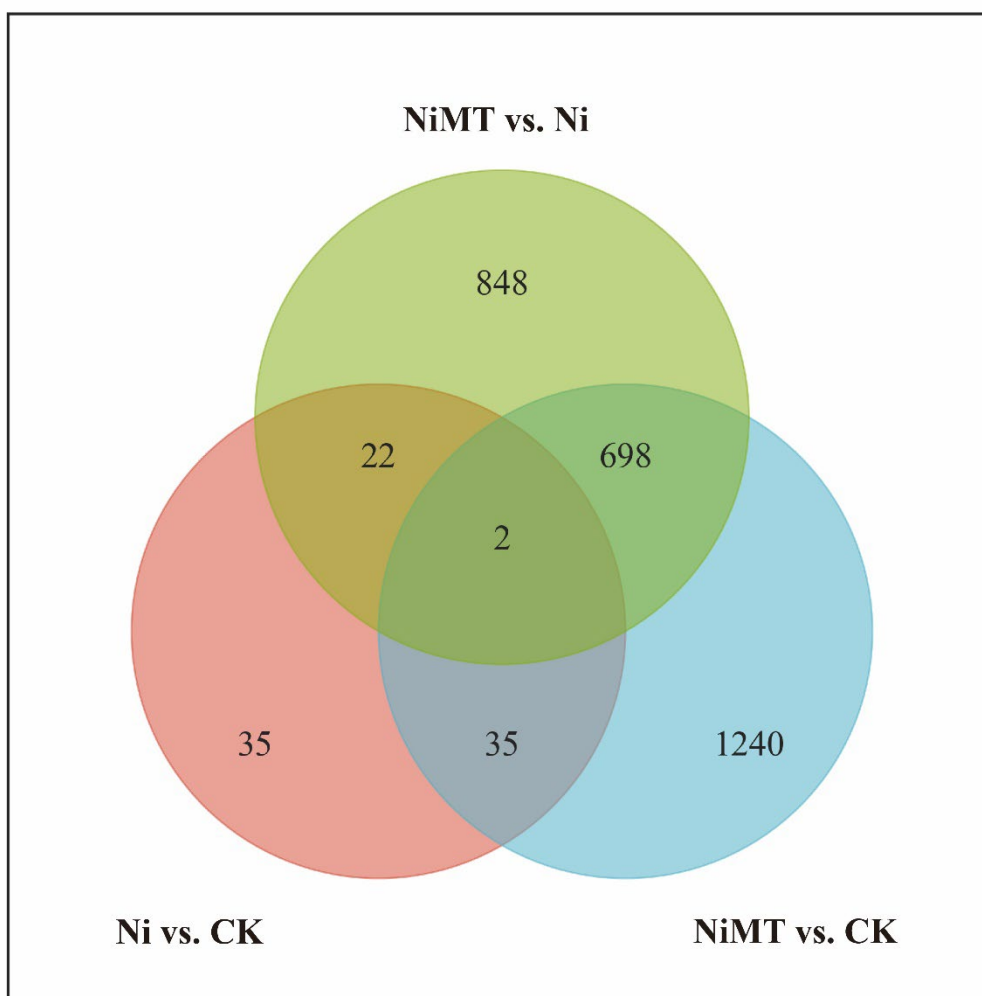

**Figure S1.** Venn plots of DEGs in the four comparisons.

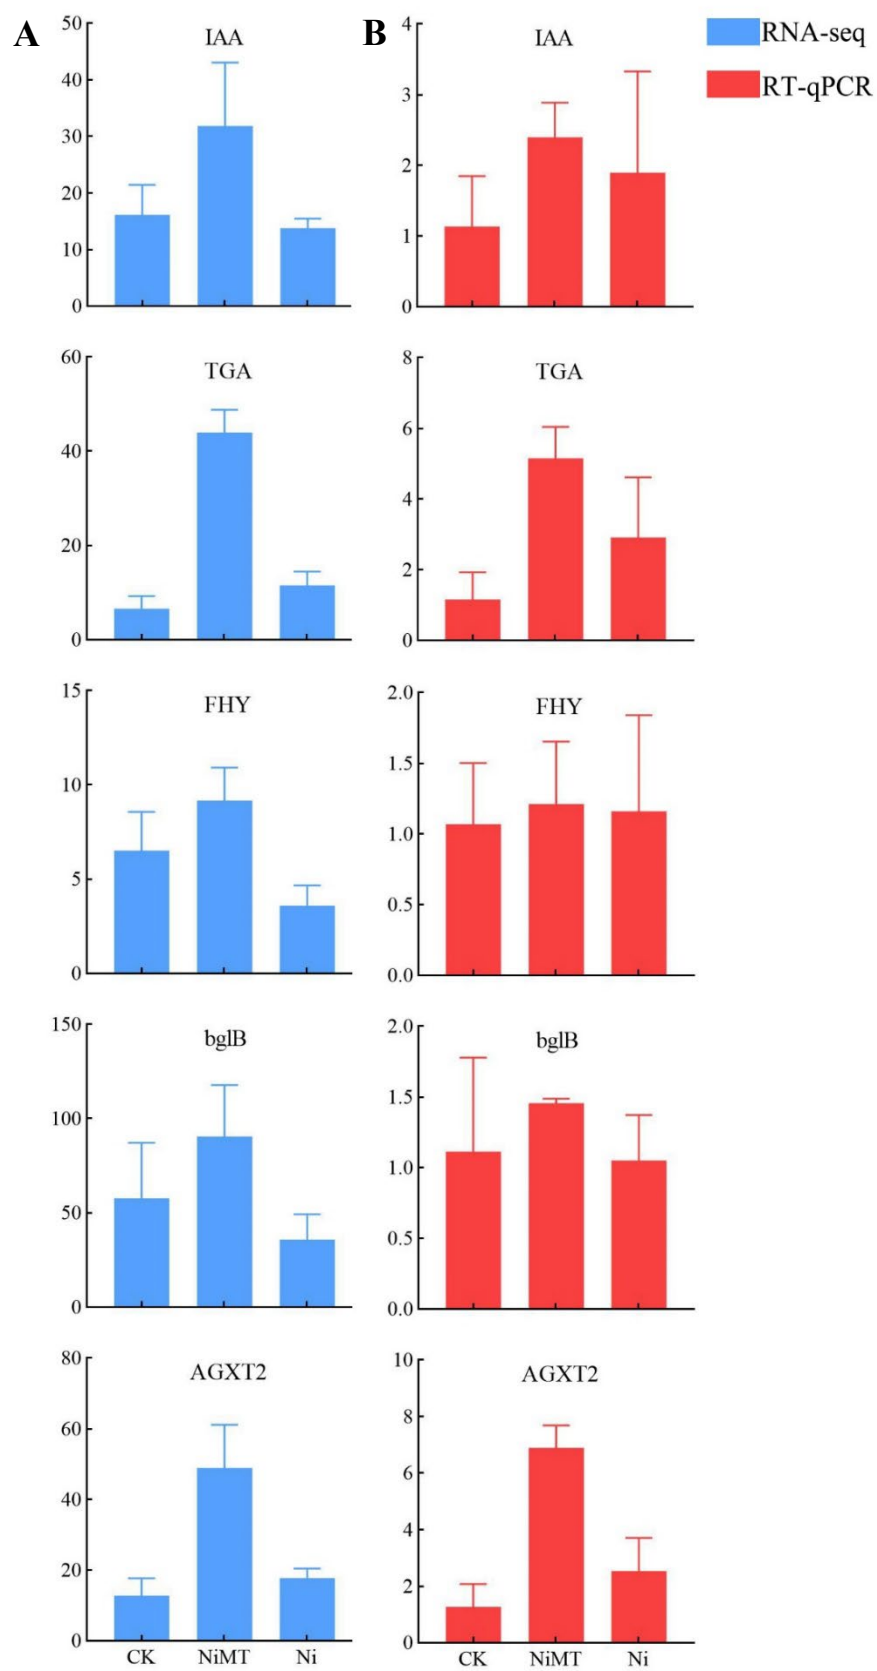

**Figure S2.** (A) FPKM trends in DEGs analyzed by RNA-seq. (B) Relative expression trends in DEGs verified by RT-qPCR.
